# Supplementary material for: Geochemistry and Microbiology Predict Environmental Niches With Conditions Favoring Potential Microbial Activity in the Bakken Shale
Source: Front Microbiol. 2020 Jul 30;11:1781. doi: 10.3389/fmicb.2020.01781 (PMC7406717; doi:10.3389/fmicb.2020.01781)
Supplement: Supplementary file 2 [file Table_1.XLSX]

## Sheet: SI Table 1
SI Table 1. Metadata, quality control filtering, and alpha diversity metrics for produced water samples
							Quality Control Filtering						Per 1942 SequencesA
	Sample ID	Well #	Sampling Event	Concentration* (ng/uL)	Origin	Formation	input	filtered	denoised	non-chimeric	filter mitochondria & chloroplasts	Total # of ASVs	ASVs	RichnessR	DiversityD	EvennessE
	1SMyN	1	May 2018	0.00	Seperator	BKN	N/A	N/A	N/A	N/A	N/A	N/A	N/A	N/A	N/A	N/A
Experimental Data	3SMy	3	May 2018	2.02	Seperator	BKN	53367	46638	46449	44320	44303	95	79	84.1429	3.23179	0.739632
	4SMy	4	May 2018	0.25	Seperator	TF1	2393	2030	1972	1942	1942	37	37	37	2.86194	0.792578
	5SMy	5	May 2018	1.03	Seperator	BKN	94473	25877	25715	24894	21362	61	52	67	3.15248	0.797844
	6SMyN	6	May 2018	0.00	Seperator	TF1	N/A	N/A	N/A	N/A	N/A	N/A	N/A	N/A	N/A	N/A
	7SMy	7	May 2018	1.30	Seperator	BKN	45826	27207	27064	25412	21166	66	64	64	3.68327	0.885639
	8SMy	8	May 2018	1.78	Seperator	BKN	47609	25553	25463	24779	20935	76	69	70.2	3.67924	0.868952
	10SMy	10	May 2018	0.302	Seperator	BKN	11126	8188	7970	7800	7794	52	47	47.1429	2.4568	0.638106
	11SMy	11	May 2018	1.26	Seperator	BKN	6812	5712	5574	5574	5574	44	43	46	2.42465	0.644647
	12SMy	12	May 2018	0.37	Seperator	TF1	61830	23426	23342	21364	21364	51	44	44	2.95253	0.780228
	13SMy	13	May 2018	19.4	Seperator	TF2	64777	43418	42553	38194	33789	125	80	103.077	2.78364	0.635239
	14SMyN	14	May 2018	0.00	Seperator	BKN	N/A	N/A	N/A	N/A	N/A	N/A	N/A	N/A	N/A	N/A
	17SMy	17	May 2018	0.13	Seperator	TF1	41919	15102	14983	14556	14556	47	46	46	3.17706	0.829815
	18SMy	18	May 2018	3.36	Seperator	U	56394	39226	39105	36446	36188	107	95	98.1111	3.59248	0.788884
	Blank 1	N/A	N/A	0.632	Extraction Blank	N/A	64373	44778	44644	40747	40747	71	64	74	3.51275	0.844638
	Blank 2	N/A	N/A	0.41	PCR Blank	N/A	106463	14472	14279	14167	14163	59	55	57	2.90184	0.724133
	Blank 3N	N/A	N/A	0.00	Extraction Blank	N/A	NA	N/A	N/A	N/A	N/A	N/A	N/A	N/A	N/A	N/A
	Blank 4N	N/A	N/A	0.00	Extraction Blank	N/A	N/A	N/A	N/A	N/A	N/A	N/A	N/A	N/A	N/A	N/A
	Blank 5N	N/A	N/A	0.00	Extraction Blank	N/A	N/A	N/A	N/A	N/A	N/A	N/A	N/A	N/A	N/A	N/A
	Blank 6N	N/A	N/A	0.00	PCR Blank	N/A	N/A	N/A	N/A	N/A	N/A	N/A	N/A	N/A	N/A	N/A
	Blank 7N	N/A	N/A	0.00	PCR Blank	N/A	N/A	N/A	N/A	N/A	N/A	N/A	N/A	N/A	N/A	N/A
	Blank 8N	N/A	N/A	0.00	PCR Blank	N/A	N/A	N/A	N/A	N/A	N/A	N/A	N/A	N/A	N/A	N/A
	Blank 9N	N/A	N/A	0.00	PCR Blank	N/A	N/A	N/A	N/A	N/A	N/A	N/A	N/A	N/A	N/A	N/A
	Blank 10N	N/A	N/A	0	PCR Blank	N/A	N/A	N/A	N/A	N/A	N/A	N/A	N/A	N/A	N/A	N/A
Data from Lipus et al. 2018	1SM	1	March 2015	N/A	Seperator	BKN	48008	5074	4707	4707	4707	12	11	11.3333	0.3099	0.129238
	2SM	2	March 2015	N/A	Tank	TF1	39270	4428	4198	4198	4198	8	8	8	0.255461	0.122851
	2TM	2	March 2015	N/A	Tank	TF1	43052	3672	3377	3377	3377	7	7	7	0.703561	0.361559
	3SM	3	March 2015	N/A	Seperator	BKN	62	3	3	3	3	1	N/A	N/A	N/A	N/A
	4SM	4	March 2015	N/A	Seperator	TF1	17421	3160	2925	2925	2925	16	16	16	1.34884	0.486492
	4TM	4	March 2015	N/A	Tank	TF1	30060	2372	2095	2095	2095	14	14	14	1.44155	0.546239
	5SM	5	March 2015	N/A	Seperator	BKN	47200	4085	3834	3834	3834	8	8	8	0.137008	0.0658867
	5TM	5	March 2015	N/A	Tank	BKN	40501	2759	2066	2066	2066	17	17	17	2.02032	0.713084
	7SM	7	March 2015	N/A	Seperator	BKN	37057	5858	5444	5444	5444	12	12	12.3333	0.249593	0.100444
	7TM	7	March 2015	N/A	Tank	BKN	52090	3801	3424	3424	3424	7	7	7	0.172516	0.0886555
	8SM	8	March 2015	N/A	Seperator	BKN	256	5	2	2	2	2	N/A	N/A	N/A	N/A
	8TM	8	March 2015	N/A	Tank	BKN	36652	3077	2256	2256	2256	13	13	13	2.02175	0.788223
	10SM	10	March 2015	N/A	Seperator	BKN	23451	5189	4853	4853	4853	29	29	29	1.37241	0.407569
	10TM	10	March 2015	N/A	Tank	BKN	32032	4452	4152	4152	4152	19	19	19	1.14446	0.388684
	11SM	11	March 2015	N/A	Seperator	BKN	34597	2587	1924	1924	1924	13	N/A	N/A	N/A	N/A
	12TM	12	March 2015	N/A	Tank	TF1	38216	2976	2654	2654	2654	9	9	9	1.13932	0.518525
	17SM	17	March 2015	N/A	Seperator	TF1	28181	5470	5244	5244	5244	16	13	13.5	0.689443	0.268794
	3TJ	3	January 2015	N/A	Tank	BKN	25072	943	711	711	711	11	N/A	N/A	N/A	N/A
	4TJ	4	January 2015	N/A	Tank	TF1	41399	1682	1405	1405	1405	9	N/A	N/A	N/A	N/A
	5SJ	5	January 2015	N/A	Seperator	BKN	90945	1253	385	385	385	1	N/A	N/A	N/A	N/A
	5TJ	5	January 2015	N/A	Tank	BKN	50550	4645	4370	4370	4370	3	3	3	0.0711081	0.0647254
	6SJ	6	January 2015	N/A	Seperator	TF1	34672	4547	4335	4335	4335	10	10	10	0.490768	0.213138
	7SJ	7	January 2015	N/A	Seperator	BKN	47342	1354	971	971	971	10	N/A	N/A	N/A	N/A
	10SJ	10	January 2015	N/A	Seperator	BKN	35590	3796	2870	2870	2870	22	22	22	2.37905	0.769659
	11SJ	11	January 2015	N/A	Seperator	BKN	43343	4054	3205	3205	3205	21	21	22	2.23551	0.734271
	13TJ	13	January 2015	N/A	Tank	TF2	5804	768	703	703	703	4	N/A	N/A	N/A	N/A
	14TJ	14	January 2015	N/A	Tank	BKN	27117	1521	1255	1255	1255	8	N/A	N/A	N/A	N/A
	1SD	1	December 2014	N/A	Seperator	BKN	76447	7602	7092	7092	7092	28	27	28.4286	1.71508	0.520378
	1TD	1	December 2014	N/A	Tank	BKN	35208	4879	4689	4689	4689	7	7	7	0.196606	0.101036
	2SD	2	December 2014	N/A	Seperator	TF1	38459	5690	5389	5389	5389	4	3	3	0.0531931	0.0484185
	2TD	2	December 2014	N/A	Tank	TF1	24825	5887	5757	5757	5757	10	10	10	0.220562	0.095789
	4TD	4	December 2014	N/A	Tank	TF1	47322	4249	4052	4052	4052	9	8	8	0.162097	0.0779521
	5SD	5	December 2014	N/A	Seperator	BKN	41121	2639	2120	2120	2120	9	9	9	0.780645	0.355287
	5TD	5	December 2014	N/A	Tank	BKN	21501	2973	2792	2792	2792	13	13	13	0.4109	0.160198
	8TD	8	December 2014	N/A	Tank	BKN	37809	4880	4606	4606	4606	15	14	14	0.658629	0.24957
	9TD	9	December 2014	N/A	Tank	TF1	44863	2340	1926	1926	1926	22	N/A	N/A	N/A	N/A
	10SD	10	December 2014	N/A	Seperator	BKN	33230	2556	2366	2366	2351	13	13	13	1.53991	0.600366
	10TD	10	December 2014	N/A	Tank	BKN	35444	4529	4121	4121	4121	19	19	19	0.850646	0.288899
	11SD	11	December 2014	N/A	Seperator	BKN	47238	4246	3027	3027	3027	25	25	25	2.42892	0.754588
	12TD	12	December 2014	N/A	Tank	TF1	26843	5218	4799	4799	4799	18	16	16.3333	0.841988	0.303683
	13SD	13	December 2014	N/A	Seperator	TF2	36064	3756	3432	3432	3432	31	31	31	2.4117	0.702303
	14SD	14	December 2014	N/A	Seperator	BKN	3639	361	307	307	307	4	N/A	N/A	N/A	N/A
	15SD	15	December 2014	N/A	Seperator	TF1	40214	5113	4857	4857	4857	14	14	14	0.635766	0.240906
	16TD	16	December 2014	N/A	Tank	BKN	44440	2482	2017	2017	2017	27	27	27	1.99257	0.604573
	1SO	1	October 2014	N/A	Tank	BKN	12124	63	11	11	11	1	N/A	N/A	N/A	N/A
	3SO	3	October 2014	N/A	Seperator	BKN	337	8	2	2	2	2	N/A	N/A	N/A	N/A
	4TO	4	October 2014	N/A	Tank	TF1	39092	251	21	21	21	2	N/A	N/A	N/A	N/A
	6TO	6	October 2014	N/A	Tank	TF1	31923	114	6	6	6	2	N/A	N/A	N/A	N/A
	8SO	8	October 2014	N/A	Seperator	BKN	6642	25	1	1	3	2	N/A	N/A	N/A	N/A
	8SO	8	October 2014	N/A	Seperator	BKN	13488	37	3	3	3	2	N/A	N/A	N/A	N/A
	10SO	10	October 2014	N/A	Seperator	BKN	10297	37	14	14	14	2	N/A	N/A	N/A	N/A
	10TO	10	October 2014	N/A	Tank	BKN	21882	45	8	8	8	2	N/A	N/A	N/A	N/A
	11SO	11	October 2014	N/A	Seperator	BKN	14776	66	12	12	12	2	N/A	N/A	N/A	N/A
	11TO	11	October 2014	N/A	Tank	BKN	43218	186	12	12	12	2	N/A	N/A	N/A	N/A
	12SO	12	October 2014	N/A	Seperator	TF1	33900	119	9	9	9	2	N/A	N/A	N/A	N/A
	12TO	12	October 2014	N/A	Tank	TF1	29301	67	22	22	22	1	N/A	N/A	N/A	N/A
	16TO	16	October 2014	N/A	Tank	BKN	38157	80	15	15	15	1	N/A	N/A	N/A	N/A
	NNo amplification detected, *Concentration of the 8 pooled technical replicates after purification, AMetrics were calculated after sequence libraries were resampled to the depth of the sample with the fewest sequences from this experiment (1942 sequences), RChao1 Index, DShannon Index, EPielou’s Evenness

## Sheet: SI Table 2
SI Table 2. All measured cations, anions, and trace metals for Bakken and Three Forks Formation produced waters. All measurements are reported in mg/L and were taken using IC unless otherwise noted. Isometric log-ratios are also presented; these values are based on molar concentrations.
Well Number	Al#	B#	Ba	Be#	Br	Ca	Cd#	Cl	Cu#	Fe#	I	K	Li	Mg	Mn#	Na	Ni#	NH4	P#	Pb#	SiO2#	Sr	SO4	Tl#	Zn#
1	BDL	349.856	53.125	BDL	656	16100	0.03116	130000	0.3002	179.059	46.9	5770	48.885	912	19.64	57400	0.4028	2150	11.988	BDL	29.225	2200	151	BDL	21.18	3.92006	-0.271459
3	BDL	430.356	66.79	BDL	854	19600	BDL	167000	0.4321	161.759	68.8	7470	69.1	1120	74.97	75700	BDL	2550	1.468	BDL	35.605	2690	120	0.8451	22.11	4.22164	-0.25371
4	BDL	376.456	57.33	BDL	711	16100	0.02782	138000	0.3395	229.559	51.9	6380	56.415	883	17.25	62500	0.1546	2170	3.117	BDL	25.215	2160	156	0.5686	23.28	3.89703	-0.252987
5	BDL	517.156	31.2745	BDL	1050	24300	0.04751	202000	0.5291	201.859	107	8900	15.0255	1350	151.2	89200	0.1213	ND	1.604	BDL	34.835	3160	85	1.04	35.31	4.61747	-0.271975
6	BDL	513.656	76.21	BDL	1050	23200	0.06796	197000	0.4967	151.259	98.3	8940	76.865	1230	146.5	88200	0.1665	3070	3.268	1.047	40.535	3000	103	1.181	37.32	4.4489	-0.261718
7	BDL	541.006	63.3925	BDL	1020	27300	0.038115	202000	0.56005	206.459	93.1	9110	84.115	1510	110.3	94900	0.31255	3210	11.038	BDL	48.625	3710	78.4	0.6216	38.885	4.75694	-0.227822
8	BDL	537.756	106.85	BDL	1020	25500	0.06895	214000	0.5122	192.259	84	9210	82.025	1390	113.9	97300	0.1751	3150	1.074	BDL	41.575	2650	80.5	BDL	37.76	4.69002	-0.251873
10	BDL	406.456	BDL	BDL	817	23100	BDL	167000	0.5278	96.779	109	6830	14.1145	1520	22.88	91900	BDL	ND	6.223	BDL	47.985	2870	137	0.708	BDL	4.24414	-0.115537
11	BDL	244.656	12.0235	BDL	406	9080	BDL	81900	0.3378	157.959	31.9	3860	23.452	709	8.488	37300	0.1867	ND	1.428	BDL	18.985	1060	178	BDL	BDL	3.39875	-0.250897
12	BDL	505.256	BDL	BDL	1090	21400	BDL	184000	0.4554	374.759	95.5	8690	11.7365	1230	27.12	83900	0.1202	ND	0.686	BDL	20.405	2640	89.2	1.269	21.11	4.49351	-0.248906
13	BDL	511.256	19.958	BDL	1100	23300	BDL	181000	0.5147	250.159	95.4	9440	12.9755	1390	20.33	92000	0.1725	ND	BDL	BDL	32.065	2560	117	1.666	23.66	4.36182	-0.173174
14	0.334	450.456	BDL	BDL	1140	18700	BDL	164000	0.4867	162.759	BDL	6990	48.495	1370	33.52	72600	0.09267	3060	2.195	BDL	36.425	2360	133	0.8885	6.805	4.11567	-0.270104
17	BDL	516.056	63.65	BDL	1160	27700	BDL	213000	0.5238	209.359	76.6	9660	74.19	1640	61.38	95800	0.1061	3730	0.273	BDL	27.295	3500	59.5	1.24	36.52	4.96228	-0.258454
18	BDL	477.956	BDL	BDL	913	19500	BDL	172000	0.4124	63.129	114	7660	15.1595	1240	12.45	85700	BDL	ND	BDL	BDL	52.855	2540	172	BDL	BDL	3.96347	-0.185665
#Measured using ICP-MS

## Sheet: SI Table 3
	SI Table 3. Relative abundance (%) of microbial families in produced water samples.
	3SMy	4SMy	5SMy	7SMy	8SMy	10SMy	11SMy	12SMy	13SMy	17SMy	18SMy	Blank 1	Blank 2
D_0__Archaea;D_1__Diapherotrites;D_2__Iainarchaeia;D_3__Iainarchaeales;D_4__uncultured archaeon	0	0	0	0	0	0	0	0	0.00591909	0	0	0	0
D_0__Archaea;D_1__Euryarchaeota;D_2__Halobacteria;D_3__Halobacteriales;D_4__Haloferacaceae	0	0	0	0	0	0	0	0	0	0	0	0	1.87107
D_0__Archaea;D_1__Euryarchaeota;D_2__Halobacteria;D_3__Halobacteriales;__	0	0	0	0	0	0	0	0	0	0	0	0.0662625	0
D_0__Archaea;D_1__Euryarchaeota;D_2__Methanobacteria;D_3__Methanobacteriales;D_4__Methanobacteriaceae	0.0112859	0	0	0.344893	0	0	0	0	0.032555	0	0	0	0
D_0__Archaea;D_1__Euryarchaeota;D_2__Methanomicrobia;D_3__Methanomicrobiales;D_4__Methanocorpusculaceae	0	0	0	0.892942	0.726057	0	0	0	0.0207168	0	0	0	0
D_0__Archaea;D_1__Euryarchaeota;D_2__Methanomicrobia;D_3__Methanosarcinales;D_4__Methanosaetaceae	0	0	0	0	0	0	0	0	0.00887863	0	0	0	0
D_0__Archaea;D_1__Nanoarchaeaeota;D_2__Woesearchaeia;D_3__uncultured archaeon CLEAR-15;D_4__uncultured archaeon CLEAR-15	0.532695	0.669413	0	0	0	0	0.358809	0	0	0	0	0	0
D_0__Archaea;D_1__Nanoarchaeaeota;D_2__Woesearchaeia;D_3__uncultured archaeon;D_4__uncultured archaeon	0.0112859	0	0	0	0	0	0	0	0.00591909	0	0	0	0
D_0__Archaea;__;__;__;__	0	0	0	0	0	0	0	0	0.032555	0	0	0	0
D_0__Bacteria;D_1__Actinobacteria;D_2__Actinobacteria;D_3__Actinomycetales;D_4__Actinomycetaceae	0	0	0	0	0.062097	0	0	0.0561693	0	0	0.588593	0	0
D_0__Bacteria;D_1__Actinobacteria;D_2__Actinobacteria;D_3__Corynebacteriales;D_4__Corynebacteriaceae	0	0	0	0	0	0	0	0.0561693	0	0	0	0	0
D_0__Bacteria;D_1__Actinobacteria;D_2__Actinobacteria;D_3__Corynebacteriales;D_4__Mycobacteriaceae	0	0	0	0	0	0	0	0	0.00887863	0	0	0	0
D_0__Bacteria;D_1__Actinobacteria;D_2__Actinobacteria;D_3__Corynebacteriales;D_4__Nocardiaceae	0	0	0	0	0	0	0	0	0.0177573	0	0	0	0
D_0__Bacteria;D_1__Actinobacteria;D_2__Actinobacteria;D_3__Frankiales;D_4__Cryptosporangiaceae	0	0	0	0	0	0	0	0.753604	0	0	0	0	0
D_0__Bacteria;D_1__Actinobacteria;D_2__Actinobacteria;D_3__Frankiales;D_4__Geodermatophilaceae	0	0	0	0	0.0429902	0	0	0	0	0	0	0	0
D_0__Bacteria;D_1__Actinobacteria;D_2__Actinobacteria;D_3__Micrococcales;D_4__Dermacoccaceae	0	0	0	0	0	0	0	0	0	0	0	0.343584	0
D_0__Bacteria;D_1__Actinobacteria;D_2__Actinobacteria;D_3__Micrococcales;D_4__Microbacteriaceae	0	0	0	0	0	0	0	0	0	0	0	0	0.169456
D_0__Bacteria;D_1__Actinobacteria;D_2__Actinobacteria;D_3__Micrococcales;D_4__Micrococcaceae	0	0	0	0	0.157631	0	0	0	0	0	0	0	0
D_0__Bacteria;D_1__Actinobacteria;D_2__Actinobacteria;D_3__PeM15;__	0.0180575	0	0	0	0	0	0	0	0	0	0	0	0
D_0__Bacteria;D_1__Actinobacteria;D_2__Actinobacteria;D_3__Propionibacteriales;D_4__Nocardioidaceae	0	0	0	0.0566947	0	0	0	0	0.00591909	0	0	0	0
D_0__Bacteria;D_1__Actinobacteria;D_2__Nitriliruptoria;D_3__Nitriliruptorales;D_4__Nitriliruptoraceae	0	0	0	0	0	0	0	0	0	0.810662	0	0	0
D_0__Bacteria;D_1__Actinobacteria;D_2__Rubrobacteria;D_3__Rubrobacterales;D_4__Rubrobacteriaceae	0	0	0	0	0	0	0	0	0	0	0	0	0.381275
D_0__Bacteria;D_1__Actinobacteria;D_2__Thermoleophilia;D_3__Solirubrobacterales;D_4__Solirubrobacteraceae	0	0	0	0	0	0	0	0	0.0147977	0	0	0	0
D_0__Bacteria;D_1__Bacteroidetes;D_2__Bacteroidia;D_3__Bacteroidales;D_4__Dysgonomonadaceae	0.0902873	0.566426	0	0	0.0143301	9.26354	0.197345	0	0.0266359	4.04644	0	0	0
D_0__Bacteria;D_1__Bacteroidetes;D_2__Bacteroidia;D_3__Bacteroidales;D_4__Marinilabiliaceae	3.61827	1.95675	0	0	0	0	1.7761	0	0.0147977	0	0	0	0
D_0__Bacteria;D_1__Bacteroidetes;D_2__Bacteroidia;D_3__Bacteroidales;D_4__Prolixibacteraceae	1.16471	1.39032	0	0	0	0	0.322928	0.0140423	0	0	0.411739	0	0
D_0__Bacteria;D_1__Bacteroidetes;D_2__Bacteroidia;D_3__Bacteroidales;D_4__Rikenellaceae	0	0	0	0	0	0	0	0	0.0177573	0	0	0	0
D_0__Bacteria;D_1__Bacteroidetes;D_2__Bacteroidia;D_3__Chitinophagales;D_4__Chitinophagaceae	0	0	0	0	0	0	0	0.140423	0.0147977	0	0	0	0
D_0__Bacteria;D_1__Bacteroidetes;D_2__Bacteroidia;D_3__Cytophagales;D_4__Cyclobacteriaceae	0	0	0	0	0	0.0384911	0	0	0	0	0	0	0
D_0__Bacteria;D_1__Bacteroidetes;D_2__Bacteroidia;D_3__Flavobacteriales;D_4__Flavobacteriaceae	0	0	0	0	0	0	0	0	0	0	0.7765	0	0
D_0__Bacteria;D_1__Bacteroidetes;D_2__Bacteroidia;D_3__Flavobacteriales;D_4__Weeksellaceae	0	0	0	0	0.0191068	0	0	0	0	0	0	0	0
D_0__Bacteria;D_1__Bacteroidetes;D_2__Bacteroidia;D_3__Sphingobacteriales;D_4__AKYH767	0	0	0	0	0	0	0	0	0.00591909	0	0	0	0
D_0__Bacteria;D_1__Bacteroidetes;D_2__Bacteroidia;D_3__Sphingobacteriales;D_4__Sphingobacteriaceae	0	0	0	0	0	0	0	0	0	0	0	0.0392667	0
D_0__Bacteria;D_1__Bacteroidetes;D_2__Ignavibacteria;D_3__Kryptoniales;D_4__BSV26	0	0	0	0	0	0	0	0	0.0858267	0	0	0	0
D_0__Bacteria;D_1__Bacteroidetes;D_2__Ignavibacteria;D_3__SJA-28;D_4__Chlorobi bacterium OLB5	0	0	0	0	0	0	0	0	0.0384741	0	0	0	0
D_0__Bacteria;D_1__Chlamydiae;D_2__Chlamydiae;D_3__Chlamydiales;D_4__Parachlamydiaceae	0	0	0	0	0	0	0	0.0234039	0	0	0	0	0
D_0__Bacteria;D_1__Chloroflexi;D_2__Anaerolineae;D_3__Anaerolineales;D_4__Anaerolineaceae	0	0	9.6901	0	0	0	0	0	0	0	0	0	0
D_0__Bacteria;D_1__Chloroflexi;D_2__Anaerolineae;D_3__SBR1031;D_4__uncultured bacterium	0	0	0	0	0	0.0513215	0	0	0	0	0	0	0
D_0__Bacteria;D_1__Chloroflexi;D_2__Chloroflexia;D_3__Thermomicrobiales;D_4__JG30-KF-CM45	0	0	0	0	0	0	0	0	0.0118382	0	0	0	0
D_0__Bacteria;D_1__Cloacimonetes;D_2__Cloacimonadia;D_3__Cloacimonadales;__	0.306977	0	0	0	0	0	0	0	0	0	0	0	0
D_0__Bacteria;D_1__Deferribacteres;D_2__Deferribacteres;D_3__Deferribacterales;D_4__Deferribacteraceae	1.47846	0.61792	0	0	0	0.192456	1.00466	0	0	0	0.558196	0	0
D_0__Bacteria;D_1__Deinococcus-Thermus;D_2__Deinococci;D_3__Deinococcales;D_4__Deinococcaceae	0	0	0	0	0	0	0	0	0	0	0.149221	0.0122708	0
D_0__Bacteria;D_1__Deinococcus-Thermus;D_2__Deinococci;D_3__Thermales;D_4__Thermaceae	0.00677155	0	0.884749	0	0.176738	0	0	0.140423	0.0384741	0.0618302	0.135404	0.0809876	0.134152
D_0__Bacteria;D_1__Elusimicrobia;D_2__Rs-M47;D_3__uncultured bacterium;D_4__uncultured bacterium	0	0	0	0	0	0	0	0	0.0118382	0	0	0	0
D_0__Bacteria;D_1__Epsilonbacteraeota;D_2__Campylobacteria;D_3__Campylobacterales;D_4__Arcobacteraceae	9.99707	10.5561	0.023406	0	0	0.269438	4.28776	3.61824	0.0680695	3.36631	6.31425	4.32424	0.0494246
D_0__Bacteria;D_1__Firmicutes;D_2__Bacilli;D_3__Bacillales;D_4__Bacillaceae	0.0654583	0.669413	3.95562	2.48512	4.0984	0.166795	0.0358809	8.66879	0.00887863	3.38692	1.34851	0.974305	13.0904
D_0__Bacteria;D_1__Firmicutes;D_2__Bacilli;D_3__Bacillales;D_4__Family X	0	0	0	0	0.200621	0	0	0	0	0	0	0	0
D_0__Bacteria;D_1__Firmicutes;D_2__Bacilli;D_3__Bacillales;D_4__Family XII	0	0	0	0	0	0	0	0	0	0	0	0	0.0423639
D_0__Bacteria;D_1__Firmicutes;D_2__Bacilli;D_3__Bacillales;D_4__Paenibacillaceae	0	0	0	0	0	0.102643	0	0	0	0	0	0	3.31145
D_0__Bacteria;D_1__Firmicutes;D_2__Bacilli;D_3__Bacillales;D_4__Staphylococcaceae	0	0	0	0.581121	0	0	0	0.163827	0	0	0.953355	0.284684	0
D_0__Bacteria;D_1__Firmicutes;D_2__Bacilli;D_3__Lactobacillales;D_4__Aerococcaceae	0.00677155	0	0	0	0.807261	0	0	0	0	0	0	0	0
D_0__Bacteria;D_1__Firmicutes;D_2__Bacilli;D_3__Lactobacillales;D_4__Carnobacteriaceae	0	0	0	0	0	0	0	0	0	0	2.11396	0	0
D_0__Bacteria;D_1__Firmicutes;D_2__Bacilli;D_3__Lactobacillales;D_4__Enterococcaceae	0	0	0	0.240952	0.401242	0	0	0.299569	0	0.0755702	0.337128	0.02945	0
D_0__Bacteria;D_1__Firmicutes;D_2__Bacilli;D_3__Lactobacillales;D_4__Lactobacillaceae	0	0	0	0.10394	0	0	0	0	0	0	0	0	0
D_0__Bacteria;D_1__Firmicutes;D_2__Clostridia;D_3__Clostridiales;D_4__Clostridiaceae 1	0.435636	0.566426	0	4.86157	0.0668737	5.24763	0.215285	3.01442	0.0147977	2.59	0.829004	22.0433	0.75549
D_0__Bacteria;D_1__Firmicutes;D_2__Clostridia;D_3__Clostridiales;D_4__Clostridiaceae 4	0	0	1.40904	0.656714	0	0	0	0	0.0858267	0	0	0	0
D_0__Bacteria;D_1__Firmicutes;D_2__Clostridia;D_3__Clostridiales;D_4__Clostridiales Incertae Sedis	0.0519152	0	0	0	2.40745	0	0	0	0.00887863	0	0	0	0
D_0__Bacteria;D_1__Firmicutes;D_2__Clostridia;D_3__Clostridiales;D_4__Eubacteriaceae	0	0	0	0	0	0.423403	0	0	0	0	0	0	0
D_0__Bacteria;D_1__Firmicutes;D_2__Clostridia;D_3__Clostridiales;D_4__Family XI	0.428865	1.49331	0	7.0018	4.877	31.319	0.556154	0.0327654	0	7.35092	0	25.0939	1.17913
D_0__Bacteria;D_1__Firmicutes;D_2__Clostridia;D_3__Clostridiales;D_4__Family XII	0.415322	0	0	0	0	0	0.107643	0	0	0	0.157511	0	0
D_0__Bacteria;D_1__Firmicutes;D_2__Clostridia;D_3__Clostridiales;D_4__Family XIII	0	0	0	0	0	0.0641519	0	0	0	0	0	0	0
D_0__Bacteria;D_1__Firmicutes;D_2__Clostridia;D_3__Clostridiales;D_4__Lachnospiraceae	0	0	0	0	0	0.654349	0	0	0.032555	0	0.0359235	0.63563	0.0564852
D_0__Bacteria;D_1__Firmicutes;D_2__Clostridia;D_3__Clostridiales;D_4__MAT-CR-H4-C10	0	0	0	0	0	0	0.107643	0	0	0	0	0	0
D_0__Bacteria;D_1__Firmicutes;D_2__Clostridia;D_3__Clostridiales;D_4__Peptococcaceae	2.01341	2.62616	0.0468121	0	0	4.0544	1.38141	0	0.165734	0	0.917431	0	0.0564852
D_0__Bacteria;D_1__Firmicutes;D_2__Clostridia;D_3__Natranaerobiales;D_4__Natranaerobiaceae	0.0632011	0	0	0	0	0	0	0	0	0	0	0	0
D_0__Bacteria;D_1__Firmicutes;D_2__Clostridia;D_3__Thermoanaerobacterales;D_4__Family III	0	0	0	0	0	0	0	0.149785	0	1.10607	0	0	0
D_0__Bacteria;D_1__Firmicutes;D_2__Clostridia;D_3__Thermoanaerobacterales;D_4__Thermoanaerobacteraceae	0.0541724	0	0	0	0	0	0	0	0	0	0	0	0
D_0__Bacteria;D_1__Firmicutes;D_2__Clostridia;__;__	0	0	0	0	0	0.205286	0	0	0	0	0	0	0
D_0__Bacteria;D_1__Firmicutes;D_2__Negativicutes;D_3__Selenomonadales;D_4__Veillonellaceae	0	1.08136	0	0	0	4.61894	0.448511	0.636585	0.0207168	16.172	0.201724	2.03451	0.494246
D_0__Bacteria;D_1__Gemmatimonadetes;D_2__Gemmatimonadetes;D_3__Gemmatimonadales;D_4__Gemmatimonadaceae	0	0	0	0	0.138524	0	0	0	0	0	0	0	0
D_0__Bacteria;D_1__Halanaerobiaeota;D_2__Halanaerobiia;D_3__Halanaerobiales;D_4__Halanaerobiaceae	27.8017	20.3399	0	1.87093	1.17984	0.628689	59.5443	10.2275	0.304833	4.89832	18.7908	1.80872	0
D_0__Bacteria;D_1__Nitrospirae;D_2__Nitrospira;D_3__Nitrospirales;D_4__Nitrospiraceae	0	0	0.107668	0	0	0	0	0	0	0	0	0	0.0353033
D_0__Bacteria;D_1__Nitrospirae;D_2__Thermodesulfovibrionia;D_3__uncultured;D_4__uncultured bacterium	0	0	3.32366	0	0	0	0	0	0.147977	0	0	0	0
D_0__Bacteria;D_1__Patescibacteria;D_2__Gracilibacteria;D_3__Absconditabacteriales (SR1);D_4__uncultured bacterium VC2.1 Bac16	0.437894	0.360453	0	0	0	0	0.233226	0	0	0	0.909141	0	0
D_0__Bacteria;D_1__Patescibacteria;D_2__Parcubacteria;D_3__Candidatus Yanofskybacteria;D_4__Parcubacteria bacterium DG_74_2	0.191861	0	0	0	0	0	0	0	0	0	0.62728	0	0
D_0__Bacteria;D_1__Proteobacteria;D_2__Alphaproteobacteria;D_3__Acetobacterales;D_4__Acetobacterales Incertae Sedis	0	0	3.53431	4.92771	1.56675	0	0	0	1.08319	0	0	0	0
D_0__Bacteria;D_1__Proteobacteria;D_2__Alphaproteobacteria;D_3__Caulobacterales;D_4__Caulobacteraceae	0	0	1.68055	3.12766	0	0	0	0.2434	2.03617	0	0.0414502	0.107983	1.86401
D_0__Bacteria;D_1__Proteobacteria;D_2__Alphaproteobacteria;D_3__Caulobacterales;D_4__Hyphomonadaceae	0	0	0	0	0	0	0	0	0.0207168	0	0	0	0
D_0__Bacteria;D_1__Proteobacteria;D_2__Alphaproteobacteria;D_3__Parvibaculales;D_4__Parvibaculaceae	0	0	1.7695	0	2.25937	0	0	0	0.772441	0	0	0	0
D_0__Bacteria;D_1__Proteobacteria;D_2__Alphaproteobacteria;D_3__Rhizobiales;D_4__Beijerinckiaceae	0	0	0.875386	0	0	0	0	0	0.372902	0.0343501	0	0	2.6195
D_0__Bacteria;D_1__Proteobacteria;D_2__Alphaproteobacteria;D_3__Rhizobiales;D_4__Hyphomicrobiaceae	0	0	0	0	0	0	0	0	0.0236763	0	0.0165801	0	0.0776672
D_0__Bacteria;D_1__Proteobacteria;D_2__Alphaproteobacteria;D_3__Rhizobiales;D_4__Rhizobiaceae	0	0	0	0	0	0.256608	0.161464	0.0327654	0	0	0	0.503105	0
D_0__Bacteria;D_1__Proteobacteria;D_2__Alphaproteobacteria;D_3__Rhizobiales;D_4__Xanthobacteraceae	0.634269	0.7724	0.674094	19.2667	12.1423	1.75776	0.322928	42.8899	0.0976649	40.0591	1.16613	8.87918	0.790793
D_0__Bacteria;D_1__Proteobacteria;D_2__Alphaproteobacteria;D_3__Rhodobacterales;D_4__Rhodobacteraceae	0	0	0	1.27091	0	0.153965	0	0.0795731	0	0	0.0276335	0	0
D_0__Bacteria;D_1__Proteobacteria;D_2__Alphaproteobacteria;D_3__Sneathiellales;D_4__Sneathiellaceae	0	0	0	0	0.0812037	0	0	0	0	0	0	0	0
D_0__Bacteria;D_1__Proteobacteria;D_2__Alphaproteobacteria;D_3__Sphingomonadales;D_4__Sphingomonadaceae	0	0	0.0374497	0.335444	0	0	0	0	0.417296	0	0.0303968	0	0.0564852
D_0__Bacteria;D_1__Proteobacteria;D_2__Alphaproteobacteria;D_3__uncultured;D_4__uncultured bacterium	0	0	0	0	0	0	0	0	0	0	0	0	0.0141213
D_0__Bacteria;D_1__Proteobacteria;D_2__Alphaproteobacteria;D_3__uncultured;__	0	0	0.0140436	0	0	0	0	0	0	0	0	0	0
D_0__Bacteria;D_1__Proteobacteria;D_2__Alphaproteobacteria;__;__	0.331806	0.566426	0	0	0	0	0	0	0.0147977	0	0.967171	0	0
D_0__Bacteria;D_1__Proteobacteria;D_2__Deltaproteobacteria;D_3__Bdellovibrionales;D_4__Bdellovibrionaceae	0	0	0.023406	0	0	0	0	0	0	0	0	0.0957126	0
D_0__Bacteria;D_1__Proteobacteria;D_2__Deltaproteobacteria;D_3__Desulfobacterales;D_4__Desulfobacteraceae	1.84863	5.71576	0	0	0	0	1.45318	0	0	0	5.66762	0	0
D_0__Bacteria;D_1__Proteobacteria;D_2__Deltaproteobacteria;D_3__Desulfovibrionales;D_4__Desulfohalobiaceae	25.6439	27.1885	0	0	0	1.11624	14.9623	1.04849	0.337388	2.37016	29.7281	1.19518	0.0706065
D_0__Bacteria;D_1__Proteobacteria;D_2__Deltaproteobacteria;D_3__Desulfovibrionales;D_4__Desulfomicrobiaceae	4.31799	6.53965	0	0.0992157	0	0	1.56082	0	0.0266359	0	1.59445	0	0
D_0__Bacteria;D_1__Proteobacteria;D_2__Deltaproteobacteria;D_3__Desulfovibrionales;D_4__Desulfovibrionaceae	0.923188	1.13285	0	0	0	0	0	1.17487	0.0887863	0	1.04731	0	0
D_0__Bacteria;D_1__Proteobacteria;D_2__Deltaproteobacteria;D_3__Desulfovibrionales;__	0	0	0	0	0	0	0.0538213	0	0	0	0	0	0
D_0__Bacteria;D_1__Proteobacteria;D_2__Deltaproteobacteria;D_3__Desulfuromonadales;D_4__Desulfuromonadaceae	3.04494	3.34706	0	0	1.2706	0.449063	1.57876	1.46508	0.0207168	0	1.07771	0	0
D_0__Bacteria;D_1__Proteobacteria;D_2__Deltaproteobacteria;D_3__Desulfuromonadales;D_4__Geobacteraceae	0.266348	0.411946	4.86378	1.45989	0.0716503	0	0.502332	0.117019	0.0118382	0.590822	0.804134	0.0883501	0.924945
D_0__Bacteria;D_1__Proteobacteria;D_2__Deltaproteobacteria;D_3__Syntrophobacterales;D_4__Syntrophaceae	0	0	0.908155	0	0.926678	0	0	0	0.0591909	0	0	0	0
D_0__Bacteria;D_1__Proteobacteria;D_2__Gammaproteobacteria;D_3__Acidiferrobacterales;D_4__Acidiferrobacteraceae	0	0	0.0748994	0	0	0	0	0	0	0	0.0663203	0	0.0847278
D_0__Bacteria;D_1__Proteobacteria;D_2__Gammaproteobacteria;D_3__Alteromonadales;D_4__Alteromonadaceae	0	0	1.34819	0	0	0	0	0	0.19533	0	0	0	0
D_0__Bacteria;D_1__Proteobacteria;D_2__Gammaproteobacteria;D_3__Alteromonadales;D_4__Idiomarinaceae	0	0	0	0	0	0	0	0	0	0	0	0	0.706065
D_0__Bacteria;D_1__Proteobacteria;D_2__Gammaproteobacteria;D_3__Alteromonadales;D_4__Marinobacteraceae	5.86191	8.13594	0.0327685	0	0	0	4.91568	2.21869	0.177573	4.00522	10.0061	0	0
D_0__Bacteria;D_1__Proteobacteria;D_2__Gammaproteobacteria;D_3__Alteromonadales;D_4__Shewanellaceae	0.171546	1.44181	0.46344	2.30558	3.51564	35.7968	0.861141	2.23273	0	4.00522	0.784791	26.1467	2.17468
D_0__Bacteria;D_1__Proteobacteria;D_2__Gammaproteobacteria;D_3__Betaproteobacteriales;D_4__Burkholderiaceae	0.225718	0	15.3778	15.3832	28.493	0.256608	0	2.00337	32.2945	0.384721	0.256991	0.996392	8.13387
D_0__Bacteria;D_1__Proteobacteria;D_2__Gammaproteobacteria;D_3__Betaproteobacteriales;D_4__Hydrogenophilaceae	0	0	0.0374497	0	0.0286601	0	0	0	0	0	0.337128	0	0
D_0__Bacteria;D_1__Proteobacteria;D_2__Gammaproteobacteria;D_3__Betaproteobacteriales;D_4__Methylophilaceae	0	0	0	0	0	0	0	0	0	0	0	0.493288	0
D_0__Bacteria;D_1__Proteobacteria;D_2__Gammaproteobacteria;D_3__Betaproteobacteriales;D_4__Neisseriaceae	0	0	0	0	0	0.0513215	0	0	0	0	0	0	0
D_0__Bacteria;D_1__Proteobacteria;D_2__Gammaproteobacteria;D_3__Betaproteobacteriales;D_4__Nitrosomonadaceae	0	0	0.0140436	0	0	0	0	0	0	0	0	0	0
D_0__Bacteria;D_1__Proteobacteria;D_2__Gammaproteobacteria;D_3__Betaproteobacteriales;D_4__Rhodocyclaceae	0.205404	0	3.35175	4.94189	1.73394	0	0	0	8.07363	0.322891	0	0	0
D_0__Bacteria;D_1__Proteobacteria;D_2__Gammaproteobacteria;D_3__Cellvibrionales;D_4__Cellvibrionaceae	0	0	0	0	0	0	0	0	0.384741	0	0	0	0
D_0__Bacteria;D_1__Proteobacteria;D_2__Gammaproteobacteria;D_3__Diplorickettsiales;D_4__Diplorickettsiaceae	0.0180575	0	0	0	0	0	0	0	0	0	0	0	0
D_0__Bacteria;D_1__Proteobacteria;D_2__Gammaproteobacteria;D_3__Ectothiorhodospirales;D_4__Thioalkalispiraceae	0	0	0.763037	0	0	0	0	0	0	0	0.348182	0	14.3825
D_0__Bacteria;D_1__Proteobacteria;D_2__Gammaproteobacteria;D_3__Enterobacteriales;D_4__Enterobacteriaceae	0	0.30896	2.6917	0	0	1.84758	0	7.34413	0	0	0	0	0.268305
D_0__Bacteria;D_1__Proteobacteria;D_2__Gammaproteobacteria;D_3__Immundisolibacterales;D_4__Immundisolibacteraceae	0	0	0.0468121	0	0	0	0	0	0	0	0.0303968	0	0
D_0__Bacteria;D_1__Proteobacteria;D_2__Gammaproteobacteria;D_3__Methylococcales;D_4__Methylomonaceae	0.999932	0	29.4589	23.5377	26.4008	0	0	0	49.1373	0	0.215541	2.38545	0.11297
D_0__Bacteria;D_1__Proteobacteria;D_2__Gammaproteobacteria;D_3__Oceanospirillales;D_4__Halomonadaceae	0.0519152	0	0.0702181	0	0	0	0	1.68508	0	0	0.00829004	0.309225	0
D_0__Bacteria;D_1__Proteobacteria;D_2__Gammaproteobacteria;D_3__Pseudomonadales;D_4__Moraxellaceae	0	0	1.90525	0.297647	0.210174	0	0	0	1.72245	0.240451	1.39549	0	0
D_0__Bacteria;D_1__Proteobacteria;D_2__Gammaproteobacteria;D_3__Pseudomonadales;D_4__Pseudomonadaceae	0.16026	0	10.5187	2.65993	2.71316	0.66718	0.340868	9.14623	1.0684	4.12201	3.64209	1.01112	46.0778
D_0__Bacteria;D_1__Proteobacteria;D_2__Gammaproteobacteria;D_3__Salinisphaerales;D_4__Solimonadaceae	0	0	0	0	2.6224	0	0	0	0.0414336	0	0	0	0
D_0__Bacteria;D_1__Proteobacteria;D_2__Gammaproteobacteria;__;__	0	0	0.023406	0	0	0.192456	0	0	0.00887863	0	0.0442136	0	0
D_0__Bacteria;D_1__Spirochaetes;D_2__Leptospirae;D_3__Leptospirales;D_4__Leptospiraceae	0	0	0	0	0	0	0	0	0.071029	0	0	0	0
D_0__Bacteria;D_1__Spirochaetes;D_2__Spirochaetia;D_3__Brevinematales;D_4__Brevinemataceae	0	0	0	0	0	0	0	0	0.00887863	0	0	0	0
D_0__Bacteria;D_1__Spirochaetes;D_2__Spirochaetia;D_3__Spirochaetales;D_4__Spirochaetaceae	0	0.514933	0	0	0	0	0	0	0	0	0	0	0
D_0__Bacteria;D_1__Synergistetes;D_2__Synergistia;D_3__Synergistales;D_4__Synergistaceae	1.69063	0	0	0	0.587533	0.153965	0.269107	0	0	0	0	0	0
D_0__Bacteria;D_1__Tenericutes;D_2__Mollicutes;D_3__Izimaplasmatales;D_4__Izimaplasmataceae	1.92086	0.566426	0	0	0	0	0.681737	0.322973	0	0	0.859401	0	0
D_0__Bacteria;D_1__Thermotogae;D_2__Thermotogae;D_3__Kosmotogales;D_4__Kosmotogaceae	0.101573	0	0	0	0	0	0	0	0	0	0	0	0
D_0__Bacteria;D_1__Thermotogae;D_2__Thermotogae;D_3__Petrotogales;D_4__Petrotogaceae	0.923188	0	0	0	0	0	0.843201	0	0.00591909	0	1.64143	0	0
D_0__Bacteria;__;__;__;__	1.45588	0.46344	0	0	0	0	0.914962	0	0.147977	0	2.03935	0.0171792	0
D_0__Eukaryota;D_1__Opisthokonta;D_2__Nucletmycea;D_3__Fungi;D_9__Incertae Sedis	0	0	0	0	0	0	0	0	0	0	0	0	0.0141213
D_0__Eukaryota;D_1__SAR;D_2__Stramenopiles;D_3__Ochrophyta;D_4__Chrysophyceae	0	0	0	1.2898	0	0	0	0	0	0	0	0	0
